# Supplementary material
Source: ML conference proceedings conference paper supplement (https://openreview.net/forum?id=r58gGdIs5xc)
Supplement: supplementary_material [file attachment]

Observation (Orders Received)

Meager

Several

Many

Very Low

Low

Medium

High

Very High

State (Financial Health Level)

$\#group > \#self$

$\#group = \#self$

$\#group < \#self$

Very Low

Low

Medium

High

Very High
